# Supplementary material for: Near-infrared luminescence and energy transfer processes in LaOF:Nd3+, Yb3+
Source: Royal Society of Chemistry journal article supplement (doi:10.1039/c6ra19953d), 2016-01-01
Supplement: c6ra19953d1.pdf [file c6ra19953d1.pdf]

## Supplementary Information

### Near-infrared luminescence and energy transfer processes in LaOF:Nd<sup>3+</sup>, Yb<sup>3+</sup>

Shiman Shi<sup>1</sup>, Qiufeng Shi<sup>1,\*</sup>, Cai'e Cui<sup>1</sup>, Lei Wang<sup>1</sup>, Yue Tian<sup>1</sup> and Ping Huang<sup>1,\*</sup>

<sup>1</sup> College of Physics and Optoelectronics, Taiyuan University of Technology, Taiyuan 030024, China

\*Corresponding author:

[shiqiufeng@tyut.edu.cn](mailto:shiqiufeng@tyut.edu.cn) (Qiufeng Shi)

[huangpinghuangka@163.com](mailto:huangpinghuangka@163.com) (Ping Huang)

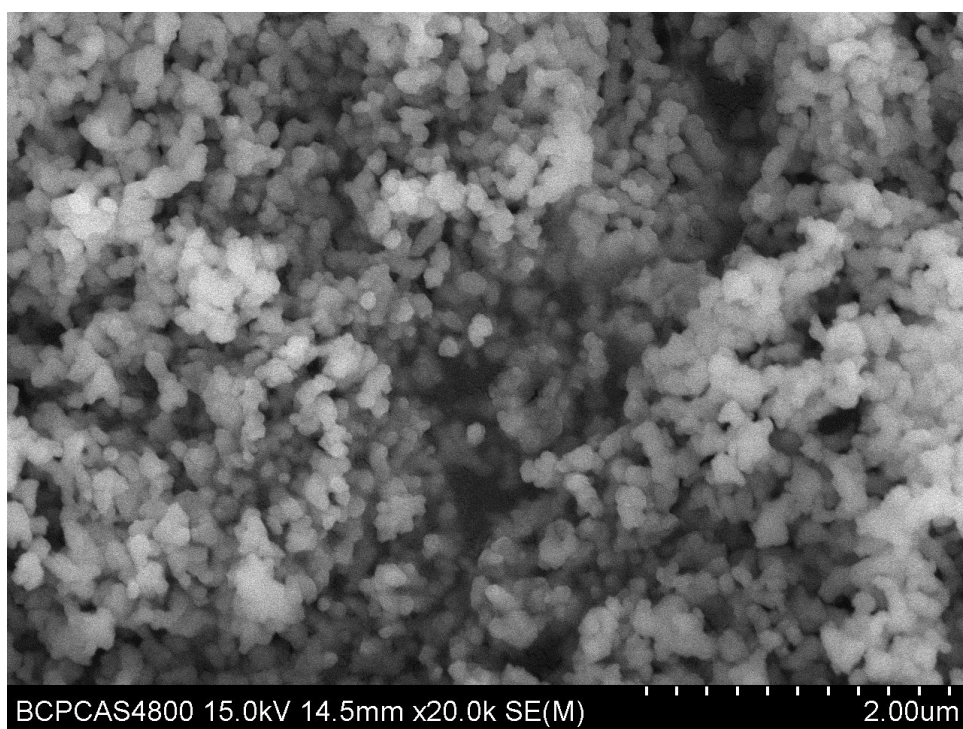

**Figure S1.** TEM image of the sample  $\text{LaOF:0.5\%Nd}^{3+}$ ,  $1.0\%\text{Yb}^{3+}$

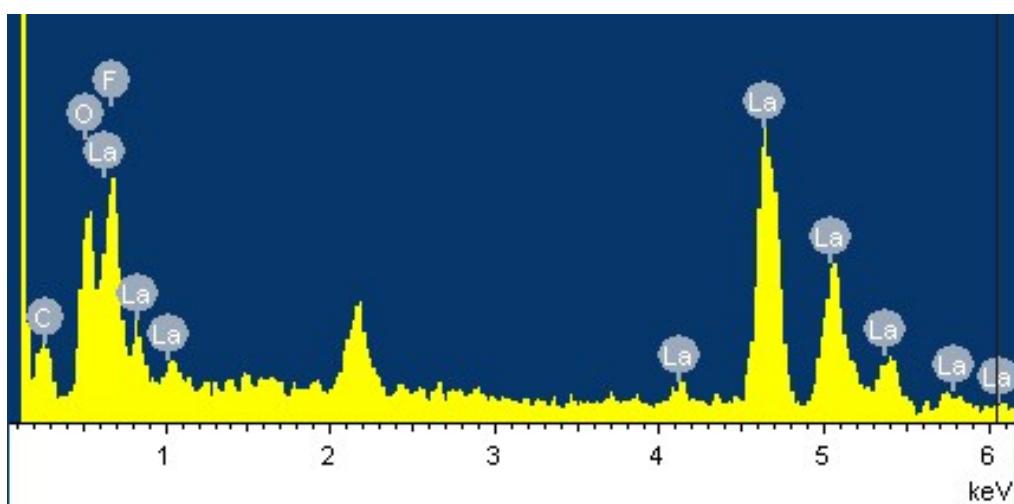

**Figure S2.** EDX spectrum of the sample  $\text{LaOF:0.5\%Nd}^{3+}$ ,  $1.0%\text{Yb}^{3+}$
